# Supplementary material
Source: publisher figshare collection journal article supplement (https://karger.figshare.com/ndownloader/files/36522513)
Supplement: Supplementary file 1 [file 36522513]

| **Supplemental table 1. Baseline clinical characteristics in patients with eGFR ≥60** | | | | |
| --- | --- | --- | --- | --- |
|  |  |  |  |  |
| **Characteristic** | **Total (N=74)** | **Serum UMOD ≤165 (ng/ml)** | **Serum UMOD >165 (ng/ml)** | **P*-*value** |
| **(N=37)** | **(N=37)** |
|  |  |  |  |  |
| Age (years) | 32 (23, 44) | 31 (24, 42) | 33 (23, 45) | 0.63 |
| Male, N (%) | 30 (41) | 15 (41) | 15 (341 | 1.00 |
| BMI (kg/m2) | 20.7 (18.8, 24.1) | 20.5 (18.6, 24.4) | 20.7 (18.8, 24.0) | 0.92 |
| Urinary protein (g/day) | 0.39 (0.26, 0.67) | 0.43 (0.26, 0.81) | 0.33 (0.22, 0.53) | 0.17 |
| Hematuria, N (%) | 63 (85) | 32 (86) | 31 (84) | 1.00 |
| Urinary UMOD/Cr (mg/g) | 82.1 (44.1, 157.7) | 75.2 (40.0, 178.3) | 89.3 (45.2, 153.3) | 0.88 |
| Alb (g/dl) | 4.2 (4.0, 4.4) | 4.1 (3.8, 4.4) | 4.2 (4.0, 4.5) | 0.10 |
| UA (mg/dl) | 5.3 ± 1.3 | 5.5 ± 1.2 | 5.0 ± 1.3 | 0.08 |
| BUN (mg/dl) | 12.4 (10.4, 18.5) | 11.8 (10.3, 14.4) | 14.0 (10.7, 16.5) | 0.10 |
| Cr (mg/dl) | 0.69 (0.58, 0.79) | 0.7 (0.58, 0.81) | 0.67 (0.57, 0.76) | 0.33 |
| eGFR (ml/min/1.73 m2) | 92.4 ± 19.0 | 90.8 ± 17.8 | 96.1 ± 20.1 | 0.19 |
| Serum UMOD (ng/ml) | 164.7 (119.1, 219.3) | 119.8 (105.7, 148.3) | 219.0 (180.8, 237.3) | <0.0001 |
| Total Chol (mg/dl) | 191.2 (174.8, 221.7) | 194.0 (175.5, 219.6) | 191.0 (173.0, 223.2) | 0.96 |
| TG (mg/dl) | 91.0 (60.8, 151.8) | 88.0 (72.5, 172.5) | 91.0 (58.5, 133.0) | 0.5 |
| LDL Chol (mg/dl) | 113.2 (92.6, 134.0) | 113.6 (92.0, 132.5) | 113.0 (92.4, 135.4) | 0.94 |
| Complication |  |  |  |  |
| Hypertention, N (%) | 13 (18) | 8 (22) | 5 (14) | 0.54 |
| Diabetes mellitus, N (%) | 3 (4) | 2 (5) | 1 (3) | 1.00 |
| Dyslipidemia, N (%) | 10 (14) | 7 (19) | 3 (8) | 0.31 |
| Ischemic heart disease, N (%) | 0 (0) | 0 (0) | 0 (0) | 1.00 |
| Cerebral infarction, N (%) | 2 (3) | 2 (4) | 2 (4) | 0.49 |
| Treatment |  |  |  |  |
| RAS blockade, N (%) | 41 (55) | 21 (57) | 20 (54) | 1.00 |
| Antiplatelet drugs, N (%) | 34 (46) | 19 (51) | 15 (41) | 0.48 |
| Steroid therapy, N (%) | 33 (45) | 16 (43) | 17 (46) | 1.00 |
| Steroid pulse therapy, N (%) | 32 (43) | 15 (41) | 17 (46) | 0.81 |
| Tonsillectomy, N (%) | 38 (51) | 17 (46) | 21 (57) | 0.49 |
|  |  |  |  |  |
|  |  |  |  |  |
| Abbreviations: BMI, body mass index; UMOD, uromodulin; Alb, albumin; UA, uric acid; BUN, blood urea nitrogen; Cr, creatinine; eGFR, estimated glomerular filtration rate; TG, triglyceride; LDL, low density lipoprotein All values are expressed as n (%) or median (25th, 75th percentiles). aMean ± SD. | | | | |
|
|
|
